# Supplementary material
Source: PubMed Central journal article supplement (PMC2672491)
Supplement: 0900270106_0900270106SI.pdf [file 0900270106_0900270106SI.pdf]

# Supporting Information

DeSilva 10.1073/pnas.0900270106

Table S1. Fossil hominin tali and tibiae measured in this study

| Accession no.  | Element         | Geological age, millions of years | Taxon                                        | Reference  |
|----------------|-----------------|-----------------------------------|----------------------------------------------|------------|
| KNM-KP 29285   | Tibia           | 4.12                              | <i>Australopithecus anamensis</i>            | 1, 2       |
| A.L. 333-6     | Tibia           | 3.2                               | <i>A. afarensis</i>                          | 3, 4       |
| A.L. 333-7     | Tibia           | 3.2                               | <i>A. afarensis</i>                          | 3, 4       |
| A.L. 288-1     | Talus and tibia | 3.18                              | <i>A. afarensis</i>                          | 3, 5       |
| StW 181        | Tibia           | 2.6-2.8                           | <i>A. africanus</i>                          | 6          |
| StW 347        | Talus           | 2.6-2.8                           | <i>A. africanus</i>                          | 6, 7       |
| StW 358        | Tibia           | 2.6-2.8                           | <i>A. africanus</i>                          | 6, 7       |
| StW 363        | Talus           | 2.6-2.8                           | <i>A. africanus</i>                          | 6, 8       |
| StW 389        | Tibia           | 2.6-2.8                           | <i>A. africanus</i>                          | 6, 7       |
| StW 88         | Talus           | 2.6-2.8                           | <i>A. africanus</i> or <i>Homo habilis</i> ? | 6, 9       |
| StW 514b       | Tibia           | 2.6-2.8                           | <i>A. africanus</i>                          | 6, 10      |
| StW 486        | Talus           | 2.6-2.8                           | <i>A. africanus</i>                          | 6, 7       |
| StW 102        | Talus           | 2.4-2.8                           | <i>A. africanus</i> or <i>H. habilis</i> ?   | 6, 7       |
| Omo 323-76-898 | Talus           | 2.2                               | <i>Homo</i> sp.                              | 11, 12     |
| TM 1517        | Talus           | 1.9-2.0                           | <i>Paranthropus robustus</i>                 | 12, 13     |
| SKX 42695      | Talus           | 1.5-2.0                           | <i>P. robustus</i> or <i>Homo</i>            | 14         |
| KNM-ER 1481    | Tibia           | 1.9                               | <i>H. habilis</i> or <i>H. erectus</i>       | 11, 15, 16 |
| KNM-ER 1500    | Tibia           | 1.9                               | <i>P. boisei</i>                             | 11, 17     |
| KNM-ER 2596    | Tibia           | 1.9                               | Hominin                                      | 11, 18     |
| KNM-ER 1476    | Talus           | 1.88                              | <i>P. boisei</i>                             | 11, 12     |
| OH 8           | Talus           | 1.85                              | <i>H. habilis</i> or <i>P. boisei</i>        | 12, 19-21  |
| OH 35          | Tibia           | 1.85                              | <i>H. habilis</i>                            | 19, 20     |
| KNM-ER 813     | Talus           | 1.85                              | <i>Homo</i> sp.                              | 11, 12     |
| KNM-ER 1464    | Talus           | 1.7                               | <i>P. boisei</i>                             | 11, 17     |
| StW 567        | Tibia           | 1.4-1.7                           | <i>H. erectus</i>                            | 6, 22      |
| KNM-ER 5428    | Talus           | 1.6                               | <i>H. erectus</i>                            | 11, 23     |
| KNM-ER 803     | Talus           | 1.53                              | <i>H. erectus</i>                            | 11, 24     |
| KNM-WT 15000   | Tibia           | 1.53                              | <i>H. erectus</i>                            | 25         |

1. Leakey MG, Feibel CS, McDougall I, Walker A (1995) New four-million-year-old hominid species from Kanapoi and Allia Bay, Kenya. *Nature* 376:565-571.
2. Leakey MG, Feibel CS, McDougall I, Ward C, Walker A (1998) New specimens and confirmation of an early age for *Australopithecus anamensis*. *Nature* 393:62-66.
3. Walter RC (1994) Age of Lucy and the First Family: Laser 40Ar/39Ar dating of the Denen Dora member of the Hadar Formation. *Geology* 22:6-10.
4. Lovejoy CO, Johanson DC, Coppens Y (1982) Hominid lower limb bones recovered from the Hadar formation: 1974-1977 collections. *Am J Phys Anthropol* 57:679-700.
5. Johanson DC, et al. (1982) Morphology of the Pliocene partial hominid skeleton (A.L. 288-1) from the Hadar formation, Ethiopia. *Am J Phys Anthropol* 57:403-451.
6. Kuman K, Clarke RJ (2000) Stratigraphy, artifact industries and hominin associations for Sterkfontein, Member 5. *J Hum Evol* 38:827-847.
7. McHenry HM, Berger L (1998) Body proportions in *Australopithecus afarensis* and *A. africanus* and the origin of the genus *Homo*. *J Hum Evol* 35:1-22.
8. Fisk GR, Macho GA (1992) Evidence of a healed compression fracture in a Plio-Pleistocene hominid talus from Sterkfontein, South Africa. *Int J Osteoarch* 2:325-332.
9. Clarke RJ (1986) in *Hominid Evolution: Past, Present, Future*, ed Tobias PV (Liss, New York), pp 287-298.
10. Berger LR, Tobias PV (1996) A chimpanzee-like tibia from Sterkfontein, South Africa and its implications for the interpretation of bipedalism in *Australopithecus africanus*. *J Hum Evol* 30:343-348.
11. Feibel CS, Brown FH, McDougall I (1989) Stratigraphic context of fossil hominins from the Omo group deposits: Northern Turkana basin, Kenya and Ethiopia. *Am J Phys Anthropol* 78:595-622.
12. Gebo DL, Schwartz GT (2006) Foot bones from Omo: Implications for human evolution. *Am J Phys Anthropol* 129:499-511.
13. McKee JK, Thackeray JF, Berger LR (1995) Faunal assemblage seriation of southern African Pliocene and Pleistocene fossil deposits. *Am J Phys Anthropol* 96:235-250.
14. Susman RL, de Ruiter DJ, Brain CK (2001) Recently identified post-cranial remains of *Paranthropus* and early *Homo* from Swartkrans Cave, South Africa. *J Hum Evol* 41:607-629.
15. Trinkaus E (1984) Does KNM-ER 1481A establish *Homo erectus* at 2.0 myr BP? *Am J Phys Anthropol* 64:137-139.
16. Kennedy GE (1983) A morphometric and taxonomic assessment of a hominine femur from the lower member, Koobi Fora, Lake Turkana. *Am J Phys Anthropol* 61:429-436.
17. Grausz HM, Leakey RE, Walker AC, Ward CV (1988) in *Evolutionary History of the "Robust" Australopithecines*, ed Grine FE (de Gruyter, New York), pp 127-132.
18. Leakey REF, Walker AC (1985) Further hominids from the Plio-Pleistocene of Koobi Fora, Kenya. *Am J Phys Anthropol* 67:135-163.
19. Leakey LSB, Tobias PV, Napier JR (1964) A new species of genus *Homo* from Olduvai Gorge. *Nature* 202:7-9.
20. Susman RL, Stern JT (1982) Functional morphology of *Homo habilis*. *Science* 217:931-934.
21. Wood BA (1974) Olduvai Bed I post-cranial fossils: A reassessment. *J Hum Evol* 3:373-378.
22. Curnoe D, Tobias PV (2006) Description, new reconstruction, comparative anatomy, and classification of the Sterkfontein Stw 53 cranium, with discussions about the taxonomy of other southern African early *Homo* remains. *J Hum Evol* 70:36-77.
23. Antón SC (2003) Natural history of *Homo erectus*. *Yearb Phys Anthropol* 122:126-170.
24. Day MH, Leakey REF (1974) New evidence of the genus *Homo* from East Rudolf, Kenya (III). *Am J Phys Anthropol* 41:367-380.
25. Walker A, Leakey REF (1993) *The Nariokotome Homo erectus skeleton* (Harvard Univ Press, Cambridge, MA).

**Table S2. Comparative morphology of the distal tibia and talus in humans, African apes, and hominins**

| Taxa                              | n   | Distal tibial morphology |             |             |             |             |              |                   | Talus |                |
|-----------------------------------|-----|--------------------------|-------------|-------------|-------------|-------------|--------------|-------------------|-------|----------------|
|                                   |     | AP lateral               | AP midpoint | AP medial   | ML anterior | ML midpoint | ML posterior | Tibial angle, °   | N     | Talar angle, ° |
| African ape                       | 97  | 0.92 ± 0.06              | 1.00 ± 0.06 | 0.93 ± 0.07 | 1.36 ± 0.07 | 1.05 ± 0.05 | 0.83 ± 0.07  | 104.1 ± 3.9(n=59) | 96    | 17.0 ± 3.2     |
| Human                             | 136 | 1.04 ± 0.05              | 0.99 ± 0.05 | 0.87 ± 0.05 | 1.17 ± 0.05 | 1.04 ± 0.04 | 0.94 ± 0.05  | 91.1 ± 2.4(n=29)  | 45    | 10.2 ± 2.3     |
| <i>Australopithecus anamensis</i> | 1   | 1.04                     | 0.97        | 0.82        | 1.16        | 1.09        | 0.96         | 93.1              | –     | –              |
| <i>A. afarensis</i>               | 3   | 1.04 ± 0.06              | 0.99 ± 0.02 | 0.85 ± 0.03 | 1.15 ± 0.03 | 1.02 ± 0.04 | 0.98 ± 0.03  | 90.8 ± 0.7        | 1     | 5.3            |
| <i>A. africanus</i>               | 2   | 1.05 ± 0.03              | 1.00 ± 0.03 | 0.90 ± 0.01 | 1.10 ± 0.01 | 1.02 ± 0.01 | 0.95 ± 0.04  | 93.3 ± 2.2(n= 3)  | 4     | 6.9 ± 1.4      |
| <i>Paranthropus robustus</i>      | –   | –                        | –           | –           | –           | –           | –            | –                 | 1     | 6.1            |
| <i>P. boisei</i>                  | 1   | 1.17                     | 1.05        | 0.83        | 1.20        | 0.97        | 0.85         | 87.4              | 2     | 8.6 ± 0.2      |
| <i>Homo</i> sp.                   | 4   | 1.06 ± 0.07              | 0.98 ± 0.06 | 0.90 ± 0.01 | 1.13 ± 0.04 | 1.04 ± 0.05 | 0.93 ± 0.03  | 90.2 ± 0.9        | 4     | 8.1 ± 1.1      |
| KNM-ER 2596                       | 1   | 1.04                     | 1.06        | 0.92        | 1.21        | 1.01        | 0.81         | 107.0             | –     | –              |

Fossil hominins grouped according to typically assigned species or genera (see [Table S1](#)). AP, anteroposterior; ML, mediolateral.
